# Supplementary material for: Association of Problematic Anger With Long-term Adjustment Following the Military-to-Civilian Transition
Source: PubMed Central journal article supplement (PMC9305378; doi:10.1001/jamanetworkopen.2022.23236), 2022-07-21
Supplement: jamanetwopen-e2223236-s002.pdf [file jamanetwopen-e2223236-s002.pdf]

\*First name, last name, and suffix (if applicable) are required and will appear in PubMed.

| <b>*Group Name(s): Millennium Cohort Study Team</b> |                   |                              |                  |                              |                                          |                                                         |                                                                                            |
|-----------------------------------------------------|-------------------|------------------------------|------------------|------------------------------|------------------------------------------|---------------------------------------------------------|--------------------------------------------------------------------------------------------|
| <b>*First Name and Middle Initial(s)</b>            | <b>*Last Name</b> | <b>*Suffix (eg, Jr, III)</b> | Academic Degrees | Institution                  | Location (city, state/province, country) | Role or Contribution, eg, chair, principal investigator | Group (if more than 1 Group listed in the byline) and/or Subgroup (eg, Steering Committee) |
| Jenn                                                | Belding           |                              | PhD              | Naval Health Research Center | San Diego, CA, USA                       | Associate Investigator                                  |                                                                                            |
| Satbir                                              | Boparai           |                              | MBA              | Naval Health Research Center | San Diego, CA, USA                       | Data Manager                                            |                                                                                            |
| Felicia                                             | Carey             |                              | PhD              | Naval Health Research Center | San Diego, CA, USA                       | Associate Investigator                                  |                                                                                            |
| Sheila                                              | Castañeda         |                              | PhD              | Naval Health Research Center | San Diego, CA, USA                       | Associate Investigator                                  |                                                                                            |
| Toni Rose                                           | Geronimo-Hara     |                              | MPH              | Naval Health Research Center | San Diego, CA, USA                       | Data Analyst                                            |                                                                                            |
| Claire                                              | Kolaja            |                              | MPH              | Naval Health Research Center | San Diego, CA, USA                       | Associate Investigator                                  |                                                                                            |
| Sandra                                              | Magallon          |                              | MPH              | Naval Health Research Center | San Diego, CA, USA                       | Research Assistant                                      |                                                                                            |
| Anna                                                | Rivera            |                              | MPH              | Naval Health Research Center | San Diego, CA, USA                       | Associate Investigator                                  |                                                                                            |
| Rudolph                                             | Rull              |                              | PhD              | Naval Health Research Center | San Diego, CA, USA                       | Principal Investigator                                  |                                                                                            |
| Julia                                               | Seay              |                              | BS               | Naval Health Research Center | San Diego, CA, USA                       | Associate Investigator                                  |                                                                                            |
| Neika                                               | Sharifian         |                              | PhD              | Naval Health Research Center | San Diego, CA, USA                       | Associate Investigator                                  |                                                                                            |
| Beverly                                             | Sheppard          |                              | BS               | Naval Health Research Center | San Diego, CA, USA                       | Study Coordinator                                       |                                                                                            |
| Daniel                                              | Trone             |                              | PhD              | Naval Health Research Center | San Diego, CA, USA                       | Associate Investigator                                  |                                                                                            |
| Jennifer                                            | Walstrom          |                              |                  | Naval Health Research Center | San Diego, CA, USA                       | Study Coordinator                                       |                                                                                            |
| Nikki                                               | Wooten            |                              | PhD              | Naval Health Research Center | San Diego, CA, USA                       | Associate Investigator                                  |                                                                                            |
| Katie                                               | Zhu               |                              | MPH              | Naval Health Research Center | San Diego, CA, USA                       | Data Analyst                                            |                                                                                            |
